# Supplementary material
Source: HighWire-hosted journal article supplement (http://mentalhealth.bmj.com/highwire/filestream/68365/field_highwire_adjunct_files/0/94102webtable.pdf)
Supplement: 94102webtable.pdf [file 94102webtable.pdf]

Dementia diagnosis and management before and after educational interventions

| <b>Group</b>                           | <b>Control</b> | <b>Decision</b>         | <b>Practice</b>        | <b>CD-ROM</b> |
|----------------------------------------|----------------|-------------------------|------------------------|---------------|
|                                        |                | <b>support software</b> | <b>based workshops</b> |               |
| % of patients with dementia diagnosed: |                |                         |                        |               |
| Before intervention                    | 89%            | 70%                     | 69%                    | 80%           |
| After intervention                     | 11%            | 30%                     | 31%                    | 20%           |
| Mean diagnosis concordance scores      |                |                         |                        |               |
| Before intervention                    | 2.8            | 2.8                     | 3.2                    | 3.1           |
| After intervention                     | 3.3            | 3.1                     | 3.5                    | 3.6           |
| Mean management concordance scores     |                |                         |                        |               |
| Before intervention                    | 1.9            | 2.0                     | 2.5                    | 2.5           |
| After intervention                     | 1.3            | 1.8                     | 2.3                    | 1.5           |
